# Supplementary material for: Trends in ANPP Response to Temperature in Wetland Meadows across a Subcontinental Gradient in Patagonia
Source: MDPI journal article supplement (doi:10.3390/meteorology1020015), 2022-06-17
Supplement: s1 [file s1]

**Table S1.** Proportion of variation explained by tree regression.

| DEP. Variable                         | CP   | nsplit | rel error | R <sup>2</sup> | xerror | xstd |
|---------------------------------------|------|--------|-----------|----------------|--------|------|
| Slope (kg/°C)                         | 0.27 | 0      | 1.00      | 0.00           | 1.00   | 0.02 |
|                                       | 0.23 | 1      | 0.73      | 0.27           | 0.73   | 0.02 |
|                                       | 0.06 | 2      | 0.50      | 0.50           | 0.50   | 0.01 |
|                                       | 0.03 | 3      | 0.44      | 0.56           | 0.44   | 0.01 |
|                                       | 0.02 | 5      | 0.38      | 0.62           | 0.39   | 0.01 |
|                                       | 0.01 | 6      | 0.36      | 0.64           | 0.36   | 0.01 |
|                                       | 0.01 | 7      | 0.35      | 0.65           | 0.35   | 0.01 |
|                                       | 0.01 | 10     | 0.31      | 0.69           | 0.33   | 0.01 |
|                                       | 0.01 | 11     | 0.30      | 0.70           | 0.32   | 0.01 |
|                                       | 0.01 | 12     | 0.29      | 0.71           | 0.30   | 0.01 |
| Pearson corr<br>of Slope over<br>time | 0.50 | 0      | 1.00      | 0.00           | 1.02   | 0.09 |
|                                       | 0.35 | 1      | 0.50      | 0.50           | 0.82   | 0.14 |
|                                       | 0.02 | 2      | 0.14      | 0.86           | 0.25   | 0.08 |
|                                       | 0.01 | 4      | 0.11      | 0.89           | 0.28   | 0.08 |

This is the output of the Tree regression analyses for either the spatial variation of the slope or of the temporal trend of it (evaluated through the Pearson correlation coefficient). It describes the proportion of variation explained by each split.
